# Supplementary material
Source: MDPI journal article supplement (doi:10.3390/horticulturae12030390)
Supplement: s1 [file horticulturae-4202440-supplementary.pdf › horticulturae-4202440-supplementary.pdf]

| Susan                                                                               |                                                                                     | Yafa                                                                                 |                                                                                       |
|-------------------------------------------------------------------------------------|-------------------------------------------------------------------------------------|--------------------------------------------------------------------------------------|---------------------------------------------------------------------------------------|
|    |    |    |    |
| <b>0 mM NaCl</b>                                                                    | <b>0.1 mM NaCl</b>                                                                  | <b>0 mM NaCl</b>                                                                     | <b>0.1 mM NaCl</b>                                                                    |
|   |   |   |   |
| <b>0 mM NaCl</b>                                                                    | <b>0.2 mM NaCl</b>                                                                  | <b>0 mM NaCl</b>                                                                     | <b>0.2 mM NaCl</b>                                                                    |
|  |  |  |  |
| <b>0 mM NaCl</b>                                                                    | <b>5 mM NaCl</b>                                                                    | <b>0 mM NaCl</b>                                                                     | <b>5 mM NaCl</b>                                                                      |

**Figure S1.** Seed germination at 25 °C for two lettuce cultivars, ‘Susan’ (high salt-sensitive) and ‘Yafa’ (low salt-sensitive), under low salinity levels of 0.1, 0.2, and 5 mM NaCl in the first experiment.

| Susan                                                                               |                                                                                     | Yafa                                                                                 |                                                                                       |
|-------------------------------------------------------------------------------------|-------------------------------------------------------------------------------------|--------------------------------------------------------------------------------------|---------------------------------------------------------------------------------------|
|    |    |    |    |
| <b>0 mM NaCl</b>                                                                    | <b>40 mM NaCl</b>                                                                   | <b>0 mM NaCl</b>                                                                     | <b>40 mM NaCl</b>                                                                     |
|   |   |   |   |
| <b>0 mM NaCl</b>                                                                    | <b>160 mM NaCl</b>                                                                  | <b>0 mM NaCl</b>                                                                     | <b>160 mM NaCl</b>                                                                    |
|  |  |  |  |
| <b>0 mM NaCl</b>                                                                    | <b>320 mM NaCl</b>                                                                  | <b>0 mM NaCl</b>                                                                     | <b>320 mM NaCl</b>                                                                    |

**Figure S2.** Seed germination at 25 °C for two lettuce cultivars, ‘Susan’ (high salt-sensitive) and ‘Yafa’ (low salt-sensitive), under high salinity levels of 40, 160, and 320 mM NaCl in the second experiment.

| Susan                                                                              |                                                                                    | Yafa                                                                                |                                                                                      |
|------------------------------------------------------------------------------------|------------------------------------------------------------------------------------|-------------------------------------------------------------------------------------|--------------------------------------------------------------------------------------|
|   |   |   |   |
| Perlite                                                                            | Peatmoss+Cocopeat                                                                  | Perlite                                                                             | Peatmoss+Cocopeat                                                                    |
|  |  |  |  |
| Perlite+Peatmoss                                                                   | Sand                                                                               | Perlite+Peatmoss                                                                    | Sand                                                                                 |

**Figure S3.** Seedling emergence at 25 °C for two lettuce cultivars, ‘Susan’ (high salt-sensitive) and ‘Yafa’ (low salt-sensitive), grown in perlite, peatmoss+cocopeat, perlite+peatmoss, and sand.
